# Supplementary material
Source: PubMed Central journal article supplement (PMC5153331)
Supplement: NIHMS1638-supplement-Supplement1.pdf [file NIHMS1638-supplement-Supplement1.pdf]

## Primer Sequences

|                                      | Forward (5' – 3')        | Reverse (5' – 3')        |
|--------------------------------------|--------------------------|--------------------------|
| CYP2B6 cDNA                          | CGTGCGGAATTGTTCCCTCTT    | GGGCTGGCCATGGAGAA        |
| TFF1 cDNA                            | CATCGACGTCCCTCCAGAAGAG   | CTCTGGGACTAATCACCGTGCTG  |
| GREB1 cDNA                           | CAAAGAATAACCTGTTGGCCCTGC | GACATGCCTGCGCTCTCATACTTA |
| TFF1 ChIP                            | CCGGCCATCTCTCACTATGAA    | CCTCCCCGCCAGGGTAAATAC    |
| Region_1 ChIP (FER1L3)               | GCCTCCAAACAAGGTGAAAGC    | TCGTGCTGTGTGGCTGAGA      |
| Region_2 ChIP (RERG)                 | TCCTTCCCTTATTGCCTTTGG    | TCTAGGCTTGAGGCTGACCATT   |
| Region_6 ChIP (CYP2B7)               | ACCCAATCTTAGCGTCAGATGAC  | TGGACTTTTCTGACCCAAGGA    |
| Region_8 ChIP (HDAC11)               | CAAGACCTTTGCAGGCAGTACTG  | GAGTGAGCGGGCTTGAAAAA     |
| Region_28 ChIP (ABCC11)              | CAATCCCCAGAGGCAAAGGT     | GCAAACAACCCACGTCCAA      |
| Region_31 ChIP (GREB1 Enh3)          | GAAGGGCAGAGCTGATAACG     | GACCCAGTTGCCACACTTTT     |
| Region_33 ChIP (IER3)                | CACCAAGGCAAGGTCACAAA     | GGGTCAGGCTGAGCTGCAT      |
| Region_42 ChIP (CYP2B6 Promoter ERE) | GCACCCAATCTTAGTGTCAGATGA | GTGGCAGCATGGACTTTTCTT    |
| Region_58 ChIP (GREB1 Enh2)          | TCTGTGGAGTGCCTGAAGTG     | GCCAATGCTTTGCCATTATT     |
| Region_78 ChIP (ESR1)                | CCTCCAGCACCTTTGTAATGC    | CCGGGCTCCAACCTTTAAGTA    |
| Region_148 ChIP (ESR2)               | CTGCCCTTTTAGGACTCCATA    | GCTCATGGGTTTTTCAATTGC    |
| Region_223 ChIP (EBAG9)              | AGGCGTCGGCTTGTATAACCT    | AATCATACCCACTGCACAGATGA  |
| Region_242 ChIP (RERG)               | GGGCAAGCAAGCGTCTTTAT     | GATGAGCGCATGCAAACAGA     |
