# Supplementary material
Source: PubMed Central journal article supplement (PMC5153331)
Supplement: NIHMS1638-supplement-Supplement2.pdf [file NIHMS1638-supplement-Supplement2.pdf]

| #rank    | chromosom | start    | end      | strand | rank | annotation | GeneBank No  |
|----------|-----------|----------|----------|--------|------|------------|--------------|
| ERa_D_1  | chr10     | 95184508 | 95184988 | +      | 1    | FER1L3     | NM_013451    |
| ERa_D_2  | chr12     | 15259442 | 15261654 | +      | 2    | RERG       | NM_032918    |
| ERa_D_3  | chr19     | 63041816 | 63042570 | +      | 3    | ZNF587     | NM_032828    |
| ERa_D_4  | chr15     | 31146630 | 31149365 | +      | 4    | RYR3       | NM_001036    |
| ERa_D_5  | chr15     | 69175738 | 69176648 | +      | 5    | THSD4      | NM_024817    |
| ERa_D_6  | chr19     | 46118735 | 46119919 | +      | 6    | CYP2A7     | NM_000764    |
| ERa_D_7  | chr2      | 2.38E+08 | 2.38E+08 | +      | 7    | MLPH       | NM_001042467 |
| ERa_D_8  | chr3      | 13492187 | 13492938 | +      | 8    | HDAC11     | NM_024827    |
| ERa_D_9  | chr19     | 63016198 | 63016884 | +      | 9    | ZNF552     | NM_024762    |
| ERa_D_10 | chr1      | 1.52E+08 | 1.52E+08 | +      | 10   | TPM3       | NM_152263    |
| ERa_D_11 | chr10     | 1.04E+08 | 1.04E+08 | +      | 11   | ARL3       | NM_004311    |
| ERa_D_12 | chr20     | 48777653 | 48778272 | +      | 12   | PARD6B     | NM_032521    |
| ERa_D_13 | chr3      | 4730400  | 4731316  | +      | 13   | ITPR1      | NM_002222    |
| ERa_D_14 | chr6      | 17497321 | 17497686 | +      | 14   | CAP2       | NM_006366    |
| ERa_D_15 | chr19     | 63079828 | 63080540 | +      | 15   | ZNF587     | NM_032828    |
| ERa_D_16 | chr17     | 72796038 | 72796720 | +      | 16   | SEPT_9     | NM_006640    |
| ERa_D_17 | chr3      | 1.97E+08 | 1.97E+08 | +      | 17   | FLJ25996   | NM_001001699 |
| ERa_D_18 | chr6      | 12827149 | 12827933 | +      | 18   | PHACTR1    | NM_030948    |
| ERa_D_19 | chr8      | 67198844 | 67199364 | +      | 19   | TRIM55     | NM_033058    |
| ERa_D_20 | chr15     | 61466609 | 61468013 | +      | 20   | CA12       | NM_001218    |
| ERa_D_21 | chr17     | 53333639 | 53334213 | +      | 21   | CUEDC1     | NM_017949    |
| ERa_D_22 | chr3      | 1.97E+08 | 1.97E+08 | +      | 22   | TNK2       | NM_005781    |
| ERa_D_23 | chr1      | 2.35E+08 | 2.35E+08 | +      | 23   | LGALS8     | NM_201545    |
| ERa_D_24 | chr8      | 91065093 | 91065652 | +      | 24   | NBN        | NM_001024688 |
| ERa_D_25 | chr7      | 16886759 | 16887050 | +      | 25   | BCMP11     | NM_176813    |
| ERa_D_26 | chr11     | 1.2E+08  | 1.2E+08  | +      | 26   | GRIK4      | NM_014619    |
| ERa_D_27 | chr17     | 41334105 | 41334707 | +      | 27   | MAPT       | NM_005910    |
| ERa_D_28 | chr16     | 46826638 | 46827941 | +      | 28   | ABCC11     | NM_032583    |
| ERa_D_29 | chr7      | 1.43E+08 | 1.43E+08 | +      | 29   | PIP        | NM_002652    |
| ERa_D_30 | chr11     | 59895048 | 59895421 | +      | 30   | MS4A7      | NM_021201    |
| ERa_D_31 | chr2      | 11589741 | 11590824 | +      | 31   | GREB1      | NM_014668    |
| ERa_D_32 | chr20     | 19211922 | 19212624 | +      | 32   | SLC24A3    | NM_020689    |
| ERa_D_33 | chr6      | 30827231 | 30827777 | +      | 33   | IER3       | NM_003897    |
| ERa_D_34 | chr1      | 1.77E+08 | 1.77E+08 | +      | 34   | RALGPS2    | NM_018037    |
| ERa_D_35 | chr2      | 1.11E+08 | 1.11E+08 | +      | 35   | RGPD5      | NM_032260    |
| ERa_D_36 | chr2      | 1.1E+08  | 1.1E+08  | +      | 36   | RGPD7      | NM_001037866 |
| ERa_D_37 | chr17     | 73928737 | 73929531 | +      | 37   | PGS1       | NM_024419    |
| ERa_D_38 | chr2      | 1.11E+08 | 1.11E+08 | +      | 38   | RGPD5      | NM_032260    |
| ERa_D_39 | chr5      | 43452613 | 43452959 | +      | 39   | CCL28      | NM_148672    |
| ERa_D_40 | chr12     | 1.15E+08 | 1.15E+08 | +      | 40   | THRAP2     | NM_015335    |
| ERa_D_41 | chr17     | 63803812 | 63805222 | +      | 41   | SLC16A6    | NM_004694    |
| ERa_D_42 | chr19     | 46187185 | 46187510 | +      | 42   | CYP2B6     | NM_000767    |
| ERa_D_43 | chr2      | 1.05E+08 | 1.05E+08 | +      | 43   | FHL2       | NM_201557    |
| ERa_D_44 | chr5      | 1.48E+08 | 1.48E+08 | +      | 44   | SPINK7     | NM_032566    |
| ERa_D_45 | chr11     | 66551625 | 66552475 | +      | 45   | SYT12      | NM_177963    |
| ERa_D_46 | chr1      | 1.14E+08 | 1.14E+08 | +      | 46   | HIPK1      | NM_181358    |
| ERa_D_47 | chr16     | 82537766 | 82538397 | +      | 47   | OSGIN1     | NM_013370    |
| ERa_D_48 | chr14     | 73845529 | 73845977 | +      | 48   | ABCD4      | NM_005050    |
| ERa_D_49 | chr6      | 20318557 | 20319869 | +      | 49   | E2F3       | NM_001949    |
| ERa_D_50 | chr17     | 36944853 | 36945627 | +      | 50   | KRT19      | NM_002276    |

|           |       |          |            |     |           |              |
|-----------|-------|----------|------------|-----|-----------|--------------|
| ERa_D_51  | chr10 | 1.04E+08 | 1.04E+08 + | 51  | ARL3      | NM_004311    |
| ERa_D_52  | chr8  | 87422996 | 87423753 + | 52  | WWP1      | NM_007013    |
| ERa_D_53  | chr10 | 79301694 | 79302443 + | 53  | DLG5      | NM_004747    |
| ERa_D_54  | chr14 | 87546280 | 87547456 + | 54  | GPR65     | NM_003608    |
| ERa_D_55  | chr2  | 1.09E+08 | 1.09E+08 + | 55  | LIMS1     | NM_004987    |
| ERa_D_56  | chr17 | 63971278 | 63971915 + | 56  | WIP1      | NM_017983    |
| ERa_D_57  | chr6  | 1.67E+08 | 1.67E+08 + | 57  | CCR6      | NM_004367    |
| ERa_D_58  | chr2  | 11596942 | 11597762 + | 58  | GREB1     | NM_014668    |
| ERa_D_59  | chr1  | 19795350 | 19796090 + | 59  | C1orf151  | NM_001032363 |
| ERa_D_60  | chr21 | 13978135 | 13979451 + | 60  | LOC441956 | NM_001013729 |
| ERa_D_61  | chr6  | 42302309 | 42303560 + | 61  | TRERF1    | NM_033502    |
| ERa_D_62  | chr3  | 4733654  | 4734576 +  | 62  | ITPR1     | NM_002222    |
| ERa_D_63  | chr10 | 1.05E+08 | 1.05E+08 + | 63  | C10orf26  | NM_017787    |
| ERa_D_64  | chr18 | 14460131 | 14461422 + | 64  | ANKRD30B  | NM_001029862 |
| ERa_D_65  | chr15 | 19260946 | 19262127 + | 65  | POTE15    | NM_207355    |
| ERa_D_66  | chr12 | 94016095 | 94016736 + | 66  | FGD6      | NM_018351    |
| ERa_D_67  | chr15 | 27902389 | 27903037 + | 67  | TJP1      | NM_003257    |
| ERa_D_68  | chr12 | 2775366  | 2776518 +  | 68  | FKBP4     | NM_002014    |
| ERa_D_69  | chr4  | 37132517 | 37133029 + | 69  | C4orf19   | NM_018302    |
| ERa_D_70  | chr4  | 6685829  | 6686198 +  | 70  | MRFAP1    | NM_033296    |
| ERa_D_71  | chr9  | 1.27E+08 | 1.27E+08 + | 71  | MAPKAP1   | NM_001006618 |
| ERa_D_72  | chr1  | 1.45E+08 | 1.45E+08 + | 72  | PRKAB2    | NM_005399    |
| ERa_D_73  | chr12 | 52663225 | 52664138 + | 73  | HOXC10    | NM_017409    |
| ERa_D_74  | chr17 | 72793997 | 72795543 + | 74  | SEPT_9    | NM_006640    |
| ERa_D_75  | chr1  | 2.06E+08 | 2.06E+08 + | 75  | CD55      | NM_000574    |
| ERa_D_76  | chr1  | 2.01E+08 | 2.01E+08 + | 76  | MYOG      | NM_002479    |
| ERa_D_77  | chr3  | 1.85E+08 | 1.85E+08 + | 77  | MAP6D1    | NM_024871    |
| ERa_D_78  | chr6  | 1.52E+08 | 1.52E+08 + | 78  | ESR1      | NM_000125    |
| ERa_D_79  | chr3  | 1.42E+08 | 1.42E+08 + | 79  | SLC25A36  | NM_018155    |
| ERa_D_80  | chr14 | 93926562 | 93927163 + | 80  | SERPINA1  | NM_001002235 |
| ERa_D_81  | chr4  | 39868882 | 39869125 + | 81  | RHOH      | NM_004310    |
| ERa_D_82  | chr9  | 1.16E+08 | 1.16E+08 + | 82  | DFNB31    | NM_015404    |
| ERa_D_83  | chrX  | 1.48E+08 | 1.48E+08 + | 83  | CXorf40A  | NM_178124    |
| ERa_D_84  | chr8  | 1.28E+08 | 1.28E+08 + | 84  | FAM84B    | NM_174911    |
| ERa_D_85  | chr10 | 61395042 | 61395713 + | 85  | CCDC6     | NM_005436    |
| ERa_D_86  | chr2  | 96709553 | 96710293 + | 86  | LOC90342  | NM_001077400 |
| ERa_D_87  | chr7  | 93361657 | 93362562 + | 87  | TFPI2     | NM_006528    |
| ERa_D_88  | chr2  | 11588563 | 11588845 + | 88  | GREB1     | NM_014668    |
| ERa_D_89  | chr4  | 1.74E+08 | 1.74E+08 + | 89  | GALNT17   | NM_001034845 |
| ERa_D_90  | chr4  | 1.41E+08 | 1.41E+08 + | 90  | SCOC      | NM_032547    |
| ERa_D_91  | chr10 | 1.05E+08 | 1.05E+08 + | 91  | NT5C2     | NM_012229    |
| ERa_D_92  | chr22 | 19600989 | 19601418 + | 92  | CRKL      | NM_005207    |
| ERa_D_93  | chr19 | 46095849 | 46096172 + | 93  | CYP2A7    | NM_000764    |
| ERa_D_94  | chr20 | 17496526 | 17496909 + | 94  | DSTN      | NM_006870    |
| ERa_D_95  | chr1  | 1.72E+08 | 1.72E+08 + | 95  | ZBTB37    | NM_032522    |
| ERa_D_96  | chr5  | 1.8E+08  | 1.8E+08 +  | 96  | SCGB3A1   | NM_052863    |
| ERa_D_97  | chr15 | 40350303 | 40350898 + | 97  | TMEM87A   | NM_015497    |
| ERa_D_98  | chr19 | 46095179 | 46095397 + | 98  | CYP2A7    | NM_000764    |
| ERa_D_99  | chr7  | 80388226 | 80388724 + | 99  | SEMA3C    | NM_006379    |
| ERa_D_100 | chr13 | 38156713 | 38157370 + | 100 | FREM2     | NM_207361    |
| ERa_D_101 | chr17 | 36345213 | 36345772 + | 101 | KRT23     | NM_015515    |

|           |       |          |          |   |     |           |              |
|-----------|-------|----------|----------|---|-----|-----------|--------------|
| ERa_D_102 | chr10 | 1.15E+08 | 1.15E+08 | + | 102 | CASP7     | NM_033340    |
| ERa_D_103 | chr22 | 29262235 | 29262504 | + | 103 | GAL3ST1   | NM_004861    |
| ERa_D_104 | chr16 | 84344286 | 84344517 | + | 104 | C16orf74  | NM_206967    |
| ERa_D_105 | chr3  | 1.9E+08  | 1.9E+08  | + | 105 | FAM79B    | NM_198485    |
| ERa_D_106 | chr1  | 21677686 | 21678010 | + | 106 | NBPF3     | NM_032264    |
| ERa_D_107 | chr3  | 1.69E+08 | 1.69E+08 | + | 107 | PDCD10    | NM_007217    |
| ERa_D_108 | chr5  | 68661571 | 68661870 | + | 108 | CCDC125   | NM_176816    |
| ERa_D_109 | chr20 | 31785368 | 31785883 | + | 109 | ZNF341    | NM_032819    |
| ERa_D_110 | chr3  | 4728431  | 4729467  | + | 110 | ITPR1     | NM_002222    |
| ERa_D_111 | chr1  | 55126444 | 55126901 | + | 111 | DHCR24    | NM_014762    |
| ERa_D_112 | chr17 | 35589834 | 35590650 | + | 112 | RAPGEFL1  | NM_016339    |
| ERa_D_113 | chr1  | 32151929 | 32152242 | + | 113 | PTP4A2    | NM_080391    |
| ERa_D_114 | chr16 | 46841931 | 46842802 | + | 114 | LONP2     | NM_031490    |
| ERa_D_115 | chr9  | 83490582 | 83491626 | + | 115 | TLE1      | NM_005077    |
| ERa_D_116 | chr13 | 92674753 | 92675717 | + | 116 | GPC6      | NM_005708    |
| ERa_D_117 | chrX  | 1.49E+08 | 1.49E+08 | + | 117 | CXorf40B  | NM_001013845 |
| ERa_D_118 | chr17 | 77655078 | 77655445 | + | 118 | CCDC57    | NM_198082    |
| ERa_D_119 | chr11 | 66772232 | 66773139 | + | 119 | FBXL11    | NM_012308    |
| ERa_D_120 | chr1  | 51559514 | 51560039 | + | 120 | EPS15     | NM_001981    |
| ERa_D_121 | chr10 | 99086807 | 99087455 | + | 121 | FRAT2     | NM_012083    |
| ERa_D_122 | chr1  | 1.47E+08 | 1.47E+08 | + | 122 | NBPF10    | NM_001039703 |
| ERa_D_123 | chr3  | 1.58E+08 | 1.58E+08 | + | 123 | FLJ16641  | NM_001004316 |
| ERa_D_124 | chr17 | 43979154 | 43980185 | + | 124 | HOXB3     | NM_002146    |
| ERa_D_125 | chr1  | 2.4E+08  | 2.4E+08  | + | 125 | RGS7      | NM_002924    |
| ERa_D_126 | chr1  | 1.43E+08 | 1.43E+08 | + | 126 | PPIAL4    | NM_178230    |
| ERa_D_127 | chr5  | 96320628 | 96320934 | + | 127 | LNPEP     | NM_175920    |
| ERa_D_128 | chr22 | 34355757 | 34356192 | + | 128 | LOC284912 | NM_203375    |
| ERa_D_129 | chr10 | 76251255 | 76251998 | + | 129 | MYST4     | NM_012330    |
| ERa_D_130 | chr1  | 2.35E+08 | 2.35E+08 | + | 130 | LGALS8    | NM_201545    |
| ERa_D_131 | chr13 | 47568680 | 47569212 | + | 131 | MED4      | NM_014166    |
| ERa_D_132 | chr13 | 32685271 | 32685615 | + | 132 | STARD13   | NM_178006    |
| ERa_D_133 | chr16 | 53518450 | 53519594 | + | 133 | IRX5      | NM_005853    |
| ERa_D_134 | chr1  | 1.44E+08 | 1.44E+08 | + | 134 | ITGA10    | NM_003637    |
| ERa_D_135 | chr21 | 39615377 | 39615901 | + | 135 | C21orf87  | NM_001040140 |
| ERa_D_136 | chr3  | 47459627 | 47460531 | + | 136 | SCAP      | NM_012235    |
| ERa_D_137 | chr1  | 16767140 | 16767901 | + | 137 | NBPF10    | NM_001039703 |
| ERa_D_138 | chr11 | 1.29E+08 | 1.29E+08 | + | 138 | TMEM45B   | NM_138788    |
| ERa_D_139 | chr17 | 23867507 | 23869378 | + | 139 | FOXN1     | NM_003593    |
| ERa_D_140 | chr6  | 35850891 | 35851148 | + | 140 | UNQ3045   | NM_207409    |
| ERa_D_141 | chr1  | 1.45E+08 | 1.45E+08 | + | 141 | NBPF8     | NM_001037501 |
| ERa_D_142 | chr1  | 1.46E+08 | 1.46E+08 | + | 142 | NBPF8     | NM_001037501 |
| ERa_D_143 | chr11 | 60688580 | 60689336 | + | 143 | VPS37C    | NM_017966    |
| ERa_D_144 | chr16 | 31140142 | 31140671 | + | 144 | TRIM72    | NM_001008274 |
| ERa_D_145 | chr8  | 11684528 | 11685163 | + | 145 | NEIL2     | NM_145043    |
| ERa_D_146 | chr4  | 39875978 | 39876547 | + | 146 | RHOH      | NM_004310    |
| ERa_D_147 | chr1  | 1.49E+08 | 1.49E+08 | + | 147 | PRUNE     | NM_021222    |
| ERa_D_148 | chr14 | 63771102 | 63771385 | + | 148 | ESR2      | NM_001437    |
| ERa_D_149 | chr11 | 71184277 | 71184946 | + | 149 | FAM86C    | NM_018172    |
| ERa_D_150 | chr1  | 1.49E+08 | 1.49E+08 | + | 150 | LASS2     | NM_022075    |
| ERa_D_151 | chr6  | 38252707 | 38253194 | + | 151 | BTBD9     | NM_152733    |
| ERa_D_152 | chr8  | 8131660  | 8132177  | + | 152 | DEFB109   | NM_001037380 |

|           |       |          |          |   |     |           |              |
|-----------|-------|----------|----------|---|-----|-----------|--------------|
| ERa_D_153 | chr12 | 51625507 | 51626772 | + | 153 | KRT18     | NM_199187    |
| ERa_D_154 | chr6  | 44293984 | 44294458 | + | 154 | SLC29A1   | NM_004955    |
| ERa_D_155 | chr5  | 1.12E+08 | 1.12E+08 | + | 155 | REEP5     | NM_005669    |
| ERa_D_156 | chr1  | 37276854 | 37277343 | + | 156 | GRIK3     | NM_000831    |
| ERa_D_157 | chr7  | 93363161 | 93364242 | + | 157 | TFPI2     | NM_006528    |
| ERa_D_158 | chr12 | 47868178 | 47868636 | + | 158 | TUBA3     | NM_006009    |
| ERa_D_159 | chr20 | 47860642 | 47861399 | + | 159 | SLC9A8    | NM_015266    |
| ERa_D_160 | chr8  | 68417127 | 68417740 | + | 160 | ARFGEF1   | NM_006421    |
| ERa_D_161 | chr14 | 89927354 | 89927532 | + | 161 | CALM1     | NM_006888    |
| ERa_D_162 | chr17 | 36028409 | 36028985 | + | 162 | SMARCE1   | NM_003079    |
| ERa_D_163 | chr5  | 1.5E+08  | 1.5E+08  | + | 163 | NDST1     | NM_001543    |
| ERa_D_164 | chr7  | 1.43E+08 | 1.43E+08 | + | 164 | PIP       | NM_002652    |
| ERa_D_165 | chr22 | 34348876 | 34349474 | + | 165 | MB        | NM_203377    |
| ERa_D_166 | chr1  | 1.47E+08 | 1.47E+08 | + | 166 | NBPF1     | NM_017940    |
| ERa_D_167 | chr19 | 43481353 | 43481970 | + | 167 | LOC541469 | NM_001013617 |
| ERa_D_168 | chr6  | 18494639 | 18495102 | + | 168 | IBRDC2    | NM_182757    |
| ERa_D_169 | chr3  | 1.59E+08 | 1.59E+08 | + | 169 | VEPH1     | NM_024621    |
| ERa_D_170 | chr3  | 1.97E+08 | 1.97E+08 | + | 170 | PCYT1A    | NM_005017    |
| ERa_D_171 | chr14 | 73321297 | 73322497 | + | 171 | C14orf43  | NM_001043318 |
| ERa_D_172 | chr1  | 2.27E+08 | 2.27E+08 | + | 172 | HIST3H3   | NM_003493    |
| ERa_D_173 | chr6  | 1.33E+08 | 1.33E+08 | + | 173 | LOC285735 | NM_001037231 |
| ERa_D_174 | chr15 | 69150352 | 69150823 | + | 174 | LRRC49    | NM_017691    |
| ERa_D_175 | chr14 | 68328207 | 68328706 | + | 175 | ZFP36L1   | NM_004926    |
| ERa_D_176 | chr15 | 37868482 | 37869083 | + | 176 | FSIP1     | NM_152597    |
| ERa_D_177 | chr5  | 96319601 | 96319946 | + | 177 | LNPEP     | NM_005575    |
| ERa_D_178 | chr9  | 1.13E+08 | 1.13E+08 | + | 178 | EDG2      | NM_001401    |
| ERa_D_179 | chr2  | 96776483 | 96776985 | + | 179 | LMAN2L    | NM_030805    |
| ERa_D_180 | chr4  | 69386465 | 69386929 | + | 180 | TMPRSS11E | NM_014058    |
| ERa_D_181 | chr19 | 18336837 | 18337122 | + | 181 | PGPEP1    | NM_017712    |
| ERa_D_182 | chr19 | 41755415 | 41756044 | + | 182 | ZNF529    | NM_020951    |
| ERa_D_183 | chr3  | 1.35E+08 | 1.35E+08 | + | 183 | TF        | NM_001063    |
| ERa_D_184 | chr4  | 68917167 | 68917631 | + | 184 | YTHDC1    | NM_001031732 |
| ERa_D_185 | chr1  | 1.44E+08 | 1.44E+08 | + | 185 | NBPF20    | NM_001037675 |
| ERa_D_186 | chr13 | 27089716 | 27090358 | + | 186 | LNX2      | NM_153371    |
| ERa_D_187 | chr20 | 52120625 | 52121008 | + | 187 | BCAS1     | NM_003657    |
| ERa_D_188 | chr16 | 87520926 | 87521372 | + | 188 | CBFA2T3   | NM_175931    |
| ERa_D_189 | chr15 | 48844439 | 48844921 | + | 189 | SPPL2A    | NM_032802    |
| ERa_D_190 | chr6  | 47091744 | 47092360 | + | 190 | GPR110    | NM_153840    |
| ERa_D_191 | chr3  | 8517061  | 8517997  | + | 191 | LMCD1     | NM_014583    |
| ERa_D_192 | chr13 | 38157877 | 38158570 | + | 192 | FREM2     | NM_207361    |
| ERa_D_193 | chr20 | 47862154 | 47862549 | + | 193 | SLC9A8    | NM_015266    |
| ERa_D_194 | chr10 | 95188126 | 95188680 | + | 194 | FER1L3    | NM_013451    |
| ERa_D_195 | chr1  | 1.44E+08 | 1.44E+08 | + | 195 | NOTCH2NL  | NM_203458    |
| ERa_D_196 | chr10 | 99197703 | 99198177 | + | 196 | ZDHHC16   | NM_198046    |
| ERa_D_197 | chr12 | 2754887  | 2755321  | + | 197 | FKBP4     | NM_002014    |
| ERa_D_198 | chr12 | 46448453 | 46448842 | + | 198 | FLJ20489  | NM_017842    |
| ERa_D_199 | chr8  | 1963427  | 1963972  | + | 199 | MYOM2     | NM_003970    |
| ERa_D_200 | chr3  | 1.27E+08 | 1.27E+08 | + | 200 | LOC200810 | NM_001015050 |
| ERa_D_201 | chr1  | 1.47E+08 | 1.47E+08 | + | 201 | NBPF15    | NM_173638    |
| ERa_D_202 | chr11 | 72061826 | 72062193 | + | 202 | PDE2A     | NM_002599    |
| ERa_D_203 | chr1  | 1.52E+08 | 1.52E+08 | + | 203 | C1orf189  | NM_001010979 |

|           |       |          |          |   |     |           |              |
|-----------|-------|----------|----------|---|-----|-----------|--------------|
| ERa_D_204 | chr17 | 70795080 | 70795499 | + | 204 | SLC25A19  | NM_021734    |
| ERa_D_205 | chrX  | 44288194 | 44288466 | + | 205 | FUNDC1    | NM_173794    |
| ERa_D_206 | chr5  | 1.72E+08 | 1.72E+08 | + | 206 | LOC153222 | NM_153607    |
| ERa_D_207 | chr11 | 1E+08    | 1E+08    | + | 207 | TMEM133   | NM_032021    |
| ERa_D_208 | chr7  | 16810018 | 16810528 | + | 208 | AGR2      | NM_006408    |
| ERa_D_209 | chr19 | 63017220 | 63017620 | + | 209 | ZNF552    | NM_024762    |
| ERa_D_210 | chr1  | 2.23E+08 | 2.23E+08 | + | 210 | WDR26     | NM_025160    |
| ERa_D_211 | chr10 | 125983   | 126473   | + | 211 | TUBB8     | NM_177987    |
| ERa_D_212 | chr5  | 1.8E+08  | 1.8E+08  | + | 212 | FLT4      | NM_182925    |
| ERa_D_213 | chr14 | 64763211 | 64764004 | + | 213 | MAX       | NM_145114    |
| ERa_D_214 | chr11 | 67320739 | 67321284 | + | 214 | ALDH3B2   | NM_001031615 |
| ERa_D_215 | chr20 | 17491255 | 17491744 | + | 215 | DSTN      | NM_006870    |
| ERa_D_216 | chr14 | 77158255 | 77158944 | + | 216 | SPTLC2    | NM_004863    |
| ERa_D_217 | chr12 | 1.23E+08 | 1.23E+08 | + | 217 | NCOR2     | NM_006312    |
| ERa_D_218 | chr9  | 1.35E+08 | 1.35E+08 | + | 218 | GTF3C4    | NM_012204    |
| ERa_D_219 | chr14 | 1.05E+08 | 1.05E+08 | + | 219 | TMEM121   | NM_025268    |
| ERa_D_220 | chr15 | 23657104 | 23657424 | + | 220 | ATP10A    | NM_024490    |
| ERa_D_221 | chr8  | 98719019 | 98719479 | + | 221 | MTDH      | NM_178812    |
| ERa_D_222 | chr15 | 61458644 | 61459909 | + | 222 | CA12      | NM_001218    |
| ERa_D_223 | chr8  | 1.11E+08 | 1.11E+08 | + | 223 | EBAG9     | NM_004215    |
| ERa_D_224 | chr4  | 1.86E+08 | 1.86E+08 | + | 224 | ACSL1     | NM_001995    |
| ERa_D_225 | chr1  | 31432121 | 31432885 | + | 225 | FAM77C    | NM_024522    |
| ERa_D_226 | chr20 | 37022195 | 37022647 | + | 226 | DHX35     | NM_021931    |
| ERa_D_227 | chr5  | 1.51E+08 | 1.51E+08 | + | 227 | ANXA6     | NM_001155    |
| ERa_D_228 | chr12 | 67484360 | 67485014 | + | 228 | MDM2      | NM_006881    |
| ERa_D_229 | chr15 | 69173074 | 69173579 | + | 229 | LRRC49    | NM_017691    |
| ERa_D_230 | chr7  | 94794596 | 94794769 | + | 230 | PON1      | NM_000446    |
| ERa_D_231 | chr17 | 33758417 | 33758656 | + | 231 | SOCS7     | NM_014598    |
| ERa_D_232 | chr1  | 1.17E+08 | 1.17E+08 | + | 232 | IGSF3     | NM_001007237 |
| ERa_D_233 | chr3  | 10127281 | 10127747 | + | 233 | C3orf24   | NM_173472    |
| ERa_D_234 | chr1  | 1.46E+08 | 1.46E+08 | + | 234 | NBPF14    | NM_015383    |
| ERa_D_235 | chr6  | 35857810 | 35858484 | + | 235 | LOC340204 | NM_001010886 |
| ERa_D_236 | chr9  | 12965579 | 12965789 | + | 236 | MPDZ      | NM_003829    |
| ERa_D_237 | chr5  | 1.48E+08 | 1.48E+08 | + | 237 | SPINK5L2  | NM_001001325 |
| ERa_D_238 | chr19 | 50002995 | 50003199 | + | 238 | BCAM      | NM_001013257 |
| ERa_D_239 | chr17 | 23876266 | 23876758 | + | 239 | FOXP1     | NM_003593    |
| ERa_D_240 | chr19 | 46988279 | 46988498 | + | 240 | CEACAM3   | NM_001815    |
| ERa_D_241 | chr4  | 1.07E+08 | 1.07E+08 | + | 241 | FLJ20184  | NM_017700    |
| ERa_D_242 | chr12 | 15264746 | 15265316 | + | 242 | RERG      | NM_032918    |
| ERa_D_243 | chr12 | 53067955 | 53068241 | + | 243 | ZNF385    | NM_015481    |
