# Supplementary material
Source: PubMed Central journal article supplement (PMC5153331)
Supplement: NIHMS1638-supplement-Supplement3.pdf [file NIHMS1638-supplement-Supplement3.pdf]

| TF          | Sum of Real Count | Sum of Random Count | Over representation | Poisson p-values |
|-------------|-------------------|---------------------|---------------------|------------------|
| ESR1        | 162               | 25.23               | 6.420927467         | 0                |
| Myf         | 427               | 192.85              | 2.21415608          | 0                |
| NHLH1       | 305               | 143.07              | 2.131823583         | 0                |
| Hand1-Tcfe2 | 2355              | 1228.77             | 1.916550697         | 0                |
| Foxd3       | 814               | 433.79              | 1.876484013         | 0                |
| Roaz        | 376               | 203.67              | 1.846123631         | 0                |
| HNF4A       | 378               | 212.63              | 1.777735973         | 0                |
| FOXI1       | 1830              | 1035.8              | 1.766750338         | 0                |
| Klf4        | 2252              | 1298.2              | 1.734709598         | 0                |
| SPIB        | 2271              | 1349.3              | 1.683094938         | 0                |
| Foxa2       | 1026              | 640.47              | 1.601948569         | 0                |
| IRF1        | 377               | 241.92              | 1.558366402         | 0                |
| REL         | 808               | 604.9               | 1.335757977         | 0                |
| ELF5        | 4677              | 3502.52             | 1.335324281         | 0                |
| FOXD1       | 921               | 692.03              | 1.330867159         | 0                |
| SP1         | 1580              | 1220.03             | 1.295050122         | 0                |
| ETS1        | 5963              | 4605.16             | 1.294851862         | 0                |
| Fos         | 1027              | 809.91              | 1.268042128         | 0                |
| MZF1_1-4    | 3678              | 2900.65             | 1.267991657         | 0                |
| SPI1        | 3955              | 3128.07             | 1.264357895         | 0                |
| MZF1_5-13   | 1247              | 1039.41             | 1.199719071         | 0                |
| BRCA1       | 11930             | 10604.97            | 1.124944248         | 0                |
| Cebpa       | 2439              | 2185.14             | 1.116175623         | 0                |
| Mafb        | 3306              | 2999.61             | 1.102143279         | 0                |
| Pax2        | 2898              | 2694.87             | 1.075376549         | 0                |
| IRF2        | 110               | 51.69               | 2.128071194         | 5.50449E-13      |
| TAL1-TCF3   | 411               | 284                 | 1.447183099         | 6.06848E-13      |
| NR2F1       | 138               | 76.91               | 1.794305032         | 1.28465E-10      |
| RELA        | 315               | 224.44              | 1.403493138         | 4.88274E-09      |
| STAT1       | 126               | 73.43               | 1.715919924         | 9.14774E-09      |
| Evi1        | 114               | 75.48               | 1.510333863         | 1.41033E-05      |
| NR3C1       | 105               | 70.69               | 1.485358608         | 5.35062E-05      |
| NF-kappaB   | 338               | 272.7               | 1.239457279         | 5.94659E-05      |
| Lhx3        | 294               | 239.12              | 1.229508197         | 0.000264773      |
| Ddit3-Cebpa | 570               | 508.03              | 1.121980985         | 0.003217475      |
| Arnt-Ahr    | 1984              | 1874.45             | 1.05844381          | 0.005841743      |
